# Supplementary material for: A procedure for the preparation of Ti-Beta zeolites for catalytic epoxidation with hydrogen peroxide
Source: Royal Society of Chemistry journal article supplement (doi:10.1039/c3gc42534g), 2014-01-01
Supplement: c3gc42534g.pdf [file c3gc42534g.pdf]

## Supporting Information

### **A procedure for the preparation of Ti-Beta zeolites for catalytic epoxidation with hydrogen peroxide**

Bo Tang<sup>1</sup>, Weili Dai<sup>1</sup>, Xiaoming Sun<sup>1,2</sup>, Naijia Guan<sup>1</sup>, Landong Li<sup>1,\*</sup>, Michael Hunger<sup>2</sup>

<sup>1</sup> *Key Laboratory of Advanced Energy Materials Chemistry (Ministry of Education), College of Chemistry, Nankai University, Tianjin 300071, People's Republic China*

<sup>2</sup> *Institute of Chemical Technology, University of Stuttgart, 70550 Stuttgart, Germany*

\*Corresponding author

Tel.: + 86-22-23500341; Fax: + 86-22-23500341

*E-mail address:* [lild@nankai.edu.cn](mailto:lild@nankai.edu.cn) (L. Li)

**Table S1** Catalytic activity of TS-1 and Ti-Beta in the epoxidation of different substrates. <sup>a</sup>

| Substrate                                                                         | Product                                                                           | Catalyst | Temperature | Selectivity <sup>b</sup> | TOF <sup>b</sup>     |
|-----------------------------------------------------------------------------------|-----------------------------------------------------------------------------------|----------|-------------|--------------------------|----------------------|
| 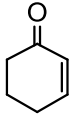 |  | TS-1     | 343 K       | 91.2 %                   | 19.7 h <sup>-1</sup> |
|                                                                                   |                                                                                   | Ti-Beta  |             | 97.8 %                   | 88.2 h <sup>-1</sup> |
|  |  | TS-1     | 343 K       | 84.7%                    | 14.7 h <sup>-1</sup> |
|                                                                                   |                                                                                   | Ti-Beta  |             | 89.2 %                   | 73.8 h <sup>-1</sup> |
|  |  | TS-1     | 333 K       | 96.6 %                   | 75.4 h <sup>-1</sup> |
|                                                                                   |                                                                                   | Ti-Beta  |             | 99.9 %                   | 38.9 h <sup>-1</sup> |

<sup>a</sup> Reaction conditions: 5 mmol substrate, 10 mL MeCN, 7.5 mmol H<sub>2</sub>O<sub>2</sub>, 0.1 g catalyst,

<sup>b</sup> at time-on-stream of 0.5 h.

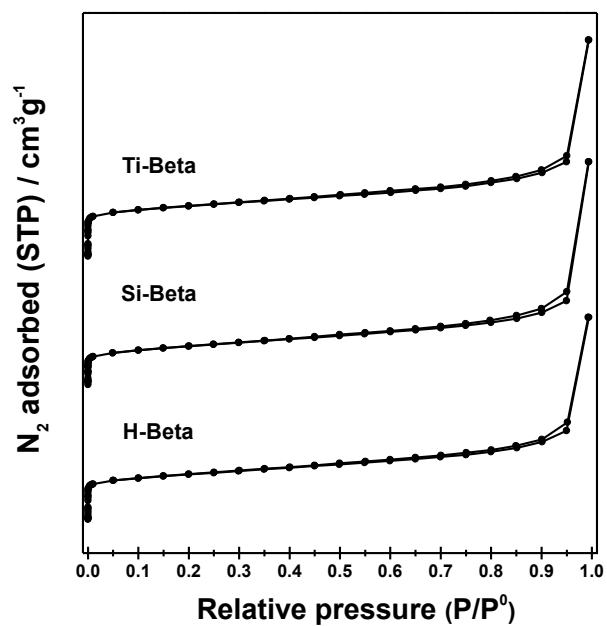

**Figure S1** N<sub>2</sub> adsorption and desorption isotherms of H-Beta, Si-Beta and Ti-Beta (5.0 wt.%).

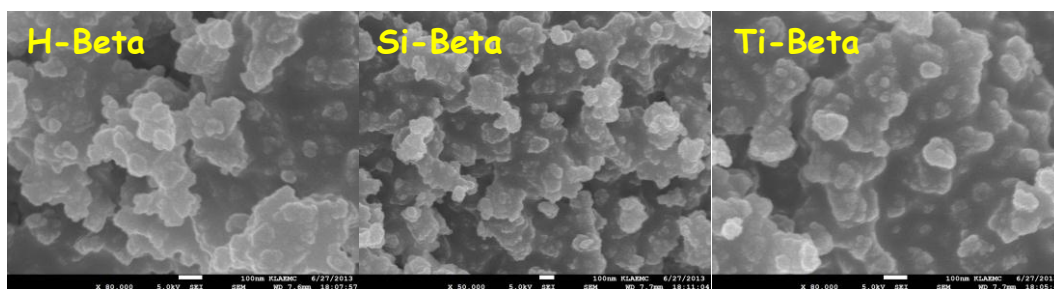

**Figure S2** SEM micrographs of of H-Beta, Si-Beta and Ti-Beta (5.0 wt.%).

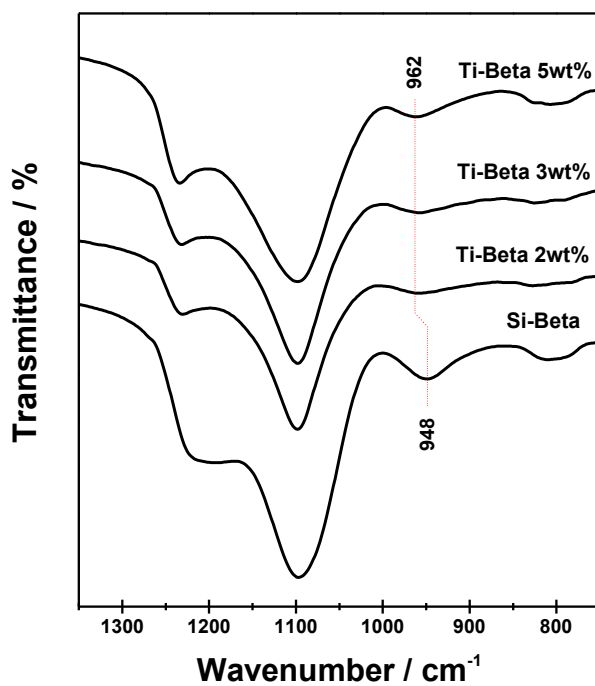

**Figure S3** FTIR spectra of Si-Beta and Ti-Beta with different Ti loadings.

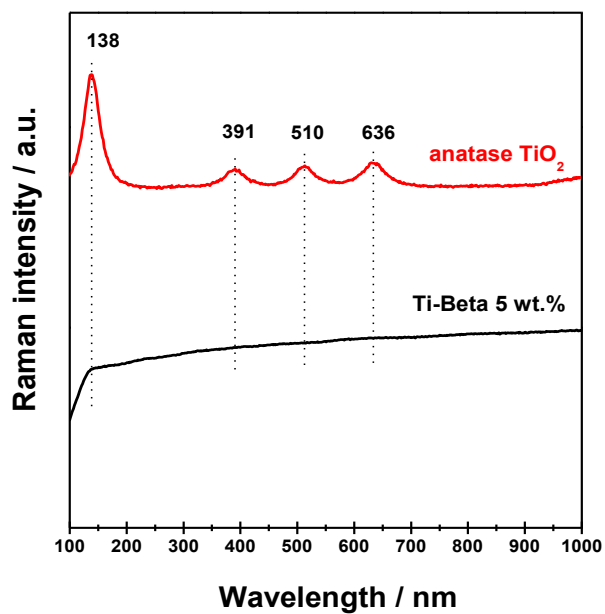

**Figure S4** Raman spectra of Ti-Beta (5 wt.%) and bulk anatase  $\text{TiO}_2$ .

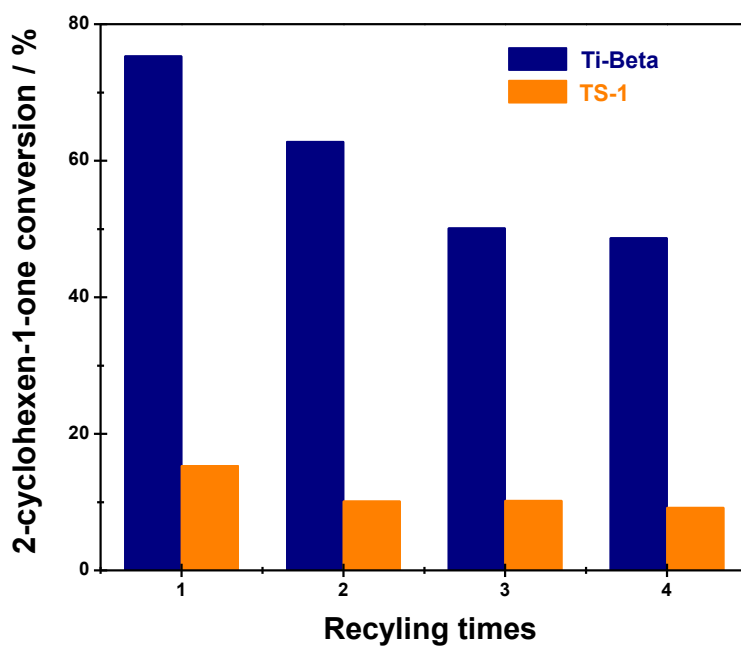

**Figure S5** Recycling ability of Ti-Beta and TS-1 in the epoxidation of 2-cyclohexene-1-one with hydrogen peroxide.

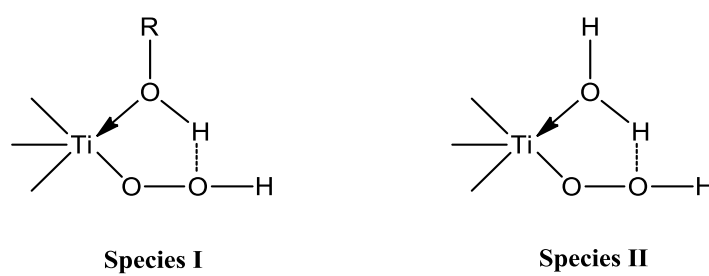

**Figure S6** Structural scheme of proposed intermediate Ti species.
